# Supplementary material
Source: PubMed Central journal article supplement (PMC2895909)

Figure S1

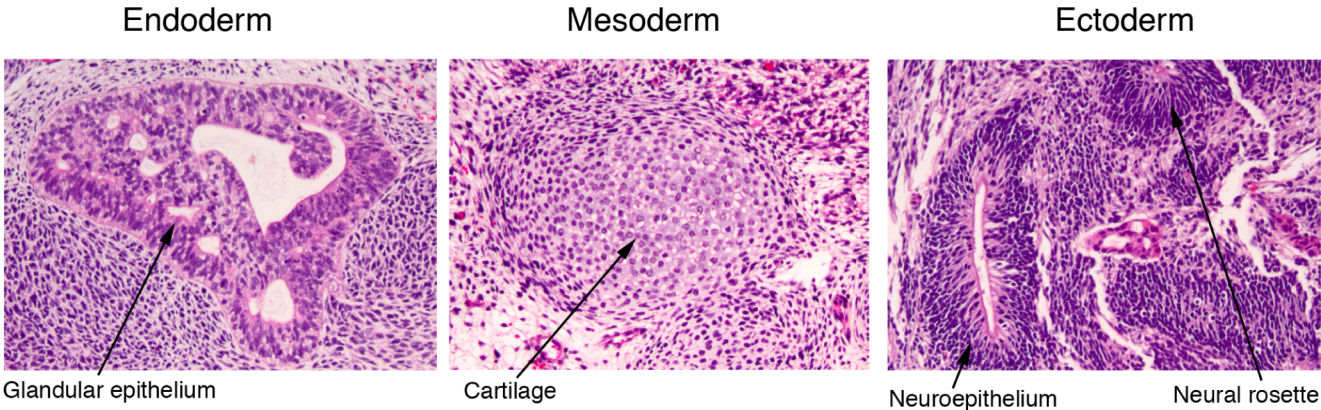

Supplement: NIHMS211136-supplement-Fig_S1.pdf [file NIHMS211136-supplement-Fig_S1.pdf]

Figure S2

A. Neuralization by EB method

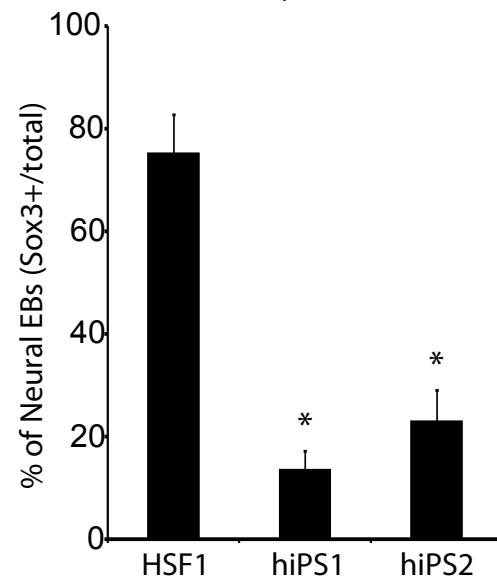

B. Neuralization by *in situ* method

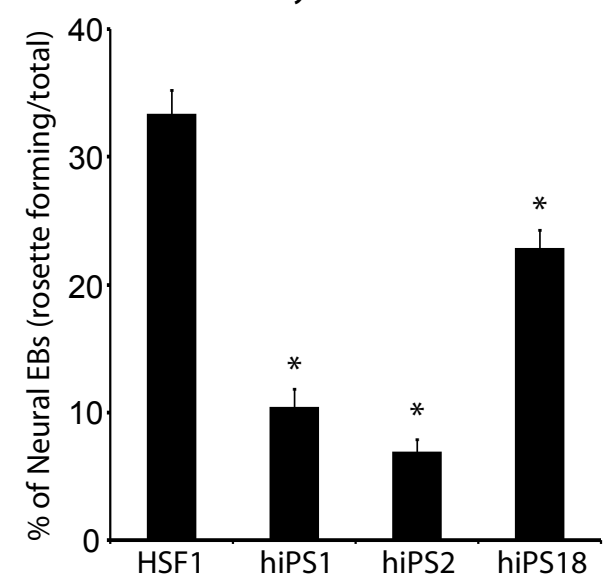

Supplement: NIHMS211136-supplement-Fig_S2.pdf [file NIHMS211136-supplement-Fig_S2.pdf]

Figure S3.

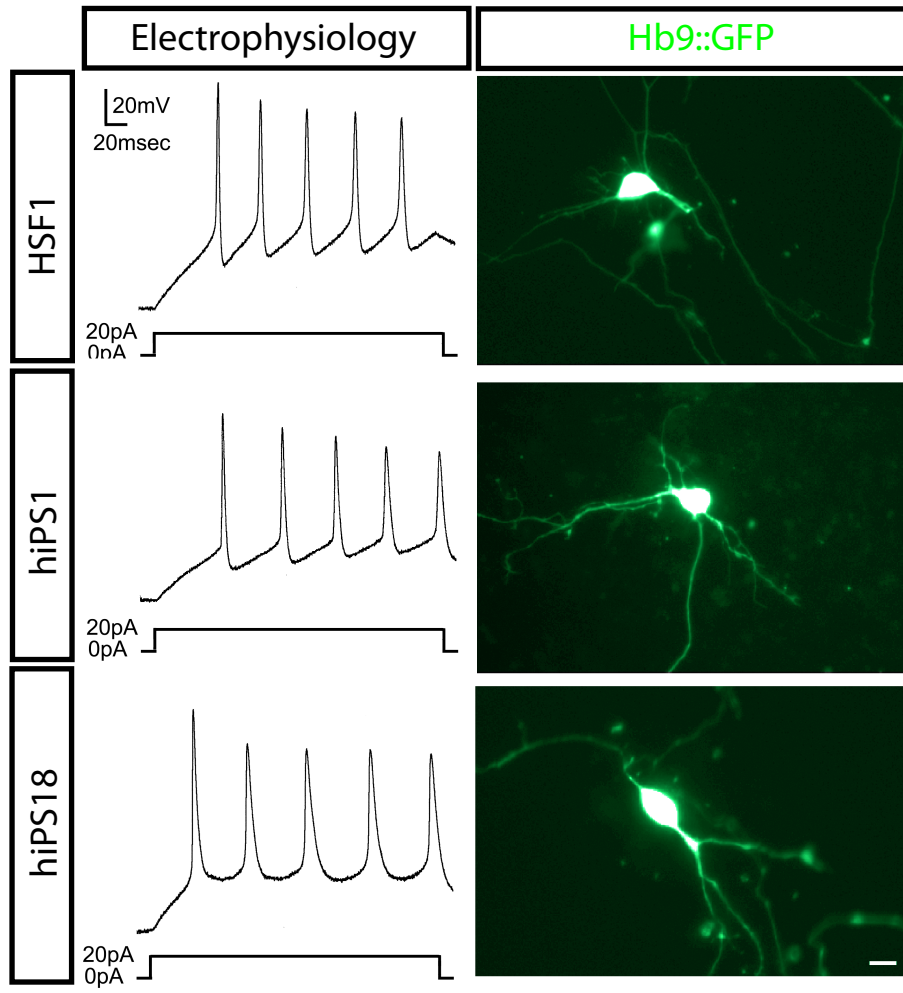

Supplement: NIHMS211136-supplement-Fig_S3.pdf [file NIHMS211136-supplement-Fig_S3.pdf]
